# Supplementary figures and images for: The topography of fibrous scaffolds modulates the paracrine function of Ad-MSCs in the regeneration of skin tissues
Source: Royal Society of Chemistry journal article supplement (doi:10.1039/c9bm00939f), 2019-01-01

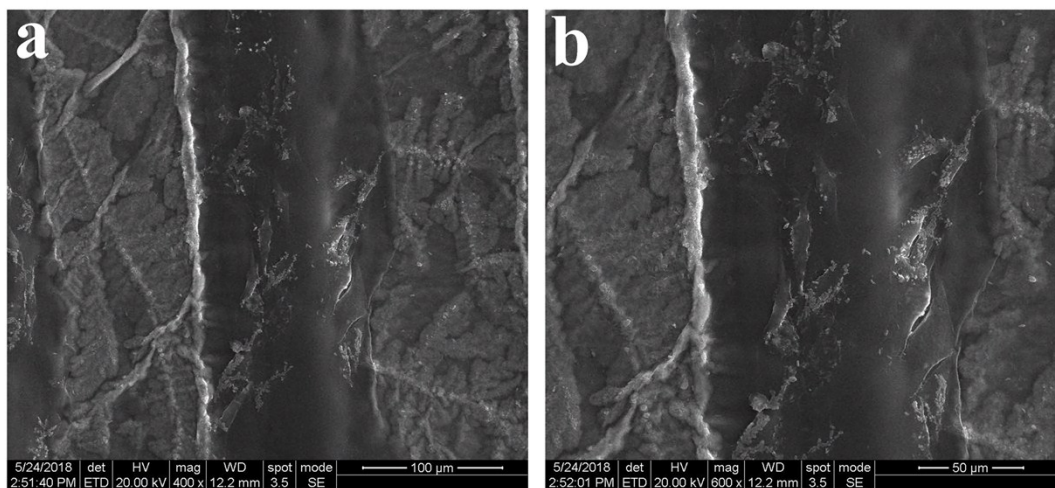

**Fig.S1.** The magnified image of cell spreading on the PBC.

Supplement: c9bm00939f1.pdf [file c9bm00939f1.pdf]
